# Supplementary material for: Exploring the coping mechanisms of Nurse Educators towards Work-Life Balance
Source: Research Square preprint supplement (doi:10.21203/rs.3.rs-7729452/v1), 2025-11-10
Supplement: Supplementary file 1 [file 480e2ff71d76932a65712b98.docx]

**Title: "Exploring the coping mechanisms of Nurse Educators towards Work-Life Balance”.**

**SEFAKO MAKGATHO HEALTH SCIENCE UNIVERSITY**

**INTERVIEW GUIDE**

| **Age:** |
| --- |
| **Gender:** |
| **Highest Qualifications:** |
| **Years of experience:** |
|  |
| 1. What do you understand about work-life balance? 2. What are your experiences regarding work-life balance as a nurse educator? 3. How do you balance your work and social life as a nurse educator? 4. What challenges have you experienced regarding your work-life balance? 5. How did you balance work and social life during the COVID-19 pandemic? 6. What is the importance of work-life balance for a nurse educator? 7. What do you think should be done to achieve balance in your work-life? 8. What support/resources would provide a more effective work-life in your institution? 9. Please suggest any coping mechanisms for nurse educators' work-life balance. |
